# Supplementary material
Source: PubMed Central journal article supplement (PMC6298866)

## **SUPPLEMENTAL MATERIALS**

### **Determining the Pathogenicity of a Genomic Variant of Uncertain Significance Using CRISPR/Cas9 and Human Induced Pluripotent Stem Cells**

Ning Ma, PhD<sup>1,2,3\*</sup>, Joe Zhang, MD, PhD<sup>1,2,3\*</sup>, Ilanit Itzhaki, PhD<sup>1,2,3\*</sup>, Sophia L. Zhang, BS<sup>1,2,3</sup>,  
Haodong Chen, PhD<sup>1,2,3</sup>, Francois Haddad, MD<sup>1,2</sup>, Tomoya Kitani, MD, PhD<sup>1,2,3</sup>, Kitchener D.  
Wilson, MD, PhD<sup>1,2,3</sup>, Lei Tian, PhD<sup>1,2,3</sup>, Rajani Shrestha, MS<sup>1,2,3</sup>, Haodi Wu, PhD<sup>1,2,3</sup>, Chi Keung  
Lam, PhD<sup>1,2,3</sup>, Nazish Sayed, MD, PhD<sup>1,2,3</sup>, Joseph C. Wu, MD, PhD<sup>1,2,3</sup>

<sup>1</sup>Stanford Cardiovascular Institute; <sup>2</sup>Division of Cardiology, Department of Medicine; <sup>3</sup>Institute  
for Stem Cell Biology and Regenerative Medicine, Stanford University School of Medicine,  
Stanford, CA 94305, USA

## **SUPPLEMENTAL METHODS**

The data, analytic methods, and study materials for the purposes of reproducing the results or replicating procedures can be made upon request to the corresponding author who manages the information.

**Cell Culture:** iPSCs were maintained under feeder-free conditions in defined E8 media (Thermo Fisher Scientific) on tissue culture plates coated with hESC-qualified Matrigel (BD Biosciences). iPSC-CMs were maintained in a RPMI 1640 medium (Thermo Fisher Scientific) supplemented with B27 supplements (Thermo Fisher Scientific) as described in published paper.<sup>1</sup> All cell types were maintained at 5% CO<sub>2</sub> and 37°C.

**PCR Detection:** DNA was extracted from collected cells using QuickExtract solution (Epicenter). PrimeSTAR® GXL DNA Polymerase (Clontech) was used for PCR. The sequence of primers used for identifying targeted colonies is as follows: forward primer, 5'-ccaagcaaagccagcctgact; and reverse primer, 5'-tgcccgaccttctcacttctcca.

**Vector Construction:** pSpCas9(BB)-2A-GFP (PX458) was a gift from Feng Zhang (Addgene plasmid # 48138). For the site-specific CRISPR/Cas9 construction, two reverse complementary guide oligos were annealed first and then ligated to the linearized PX458 vector.

**Fluorescent Activated Cell Sorting (FACS):** iPSC-CMs were treated with Accutase® solution (Sigma-Aldrich) at 37°C for 5 minutes. Afterwards, cells were collected for centrifugation, following which the supernatant was removed and the cell pellet was resuspended using PBS.

Fixation, permeabilization, and antibody staining were then performed following the instruction of the BD Cytotfix/Cytoperm™ Fixation/Permeabilization Solution Kit (Thermo Fisher Scientific, BDB554714). After staining, cells were resuspended in 500 uL of FACS buffer. Cell solution was then filtered in Falcon® 5mL Round Bottom Polystyrene, 12 x 75 mm Test Tube, with Cell Strainer Snap Cap (Corning), and loaded on a BD Biosciences FACS Aria II instrument fitted with a 100 µm nozzle using FACSDiva software. For iPSC characterization, anti-OCT4 antibody (Abcam, ab181557) and anti-SSEA4 antibody (Abcam, ab16287) were used. For detection of iPSC-CMs cardiac-specific proteins, anti-cardiac troponin T antibody (Abcam, ab45932) and anti sarcomeric- $\alpha$ -actinin antibody (Sigma-Aldrich, A7811-100UL) were applied.

**Quantitative PCR (qPCR):** Total RNAs were isolated from all studied iPSC-CMs lines at day 45-50 post differentiation, using the miRNeasy Mini kit (QIAGEN). 1 µg of RNA was used for synthesizing cDNA with the iScript™ cDNA Synthesis kit (Bio-Rad). 0.25 µL of the cDNA was used to quantify gene expression using TaqMan probes and TaqMan Universal PCR Master Mix (Thermo Fisher Scientific).

**Cell Size Measurement:** Cells were first fixed by 4% paraformaldehyde (PFA) for 10 minutes at room temperature. After washing twice with PBS, cells were incubated with 0.1% Triton® X-100 for 20 minutes. Cells were then stained using 0.1% Triton® X-100, 0.1% Hoechst (Thermo Fisher Scientific) and 0.2% Alexa Fluor® 488 Phalloidin (Thermo Fisher Scientific) for 1 hour at room temperature. After washing twice with PBS, cells were imaged using a Cytation 5 Imaging Reader.

**Contractility Assay:** iPSC-CMs were dissociated using Accutase for 5 minutes and then were collected for centrifugation. Afterwards, cells were resuspended and counted. Each well of a 24-well plate was seeded with 300k cells, forming a synchronously beating iPSC-CMs monolayer. After a week of recovery, contractility was measured using the Sony SI8000 cell motion imaging system, in the presence of 5% CO<sub>2</sub> and at a temperature of 37°C. Prior to initiation of recording, the cells were given time to equilibrate for 15 minutes at the given setting. Video imaging of the beating iPSC-CMs monolayers were recorded from 2 separate locations in each well (center and lateral edge), spatially adjusted in an automated recognized fashion, for 10 sec, at a frame rate of 75 fps, a resolution of 1024 × 24 pixels, and a depth of 8 bits using a 10× objective.

**Optical Imaging of ASAP2:** Dissociated iPSC-CMs were seeded on Matrigel-coated 35 mm glass bottom dishes with 20 mm micro-well (Cellvis). iPSC-CMs were infected with the pLV-EF1A-ASAP2 lentiviral vector (gift from Dr. Michael Z. Lin at Stanford University) with the multiplicity of infection (MOI) of 3 in RPMI-B27 medium containing polybrene (1 µg/ml) (VectorBuilder). Optical imaging of ASAP2 was performed 7 days after infection. Cells were superfused with Tyrode's solution at 37°C. The Tyrode solution consisted of NaCl (140 mmol/L), KCl (5.4 mmol/L), CaCl<sub>2</sub> (1.8 mmol/L), MgCl<sub>2</sub> (1 mmol/L), HEPES (10 mmol/L), and glucose (10 mmol/L); pH was adjusted to 7.4 with NaOH. ASAP2 was excited at 488 nm and emission was collected over 510 nm. Line scan images were acquired on a Zeiss LSM710 confocal microscope (Zeiss) equipped with a 40× oil lens (NA: 1.30). Data were analyzed using ImageJ.

**Ca<sup>2+</sup> Imaging:** Dissociated iPSC-CMs were seeded on Matrigel-coated coverslips (CS-24/50,

thickness 1 mm, Warner Instruments). Cells were loaded with 5  $\mu$ M Fura-2AM (Thermo Fisher Scientific) in the presence of 0.02% Pluronic F-127 (Thermo Fisher Scientific) in Tyrode's solution for 10 minutes at room temperature, followed by washing with Tyrode's solution. iPSC-CMs were field-stimulated at 0.5 Hz at 37°C. Single cell  $\text{Ca}^{2+}$  imaging was conducted on a Nikon Eclipse Ti-E inverted microscope mounted with 40 $\times$  oil immersion objective (0.95 NA). Fura-2 was excited at 340 nm and 380 nm wavelength using a Lambda DG-4 ultra-high-speed wavelength switcher (Sutter Instrument), and the emission of Fura-2 was collected over 510 nm wavelength. Raw data were analyzed using customized Matlab scripts and  $\text{Ca}^{2+}$  signal was presented as 340/380 ratio.

## SUPPLEMENTAL FIGURE LEGENDS

**Supplemental Figure S1. Pedigree of the VUSMYL3<sub>(170C>A)</sub> carrier's family. (A)** Pie chart depicting the overall annotation profile of genetic variants that were detected in 135 heart disease-related genes across 54 healthy individuals. Numbers in the pie chart present the number of variants per category. **(B)** Schematic pedigree of the proband's family. The VUSMYL3<sub>(170C>A)</sub> carrying proband (II-1) is marked by a red asterisk. Female family member are marked by circles and male by squares. Shaded symbols indicate members carrying the VUSMYL3<sub>(170C>A)</sub>, whereas open symbols represent absence of the VUSMYL3<sub>(170C>A)</sub>. **(C)** Sanger sequencing results of all family members of the VUSMYL3<sub>(170C>A)</sub> carrier. Nucleotides positions of the VUSMYL3<sub>(170C>A)</sub> are depicted by framing squares.

**Supplemental Figure S2. Pluripotency identification of iPSCs derived from the heterozygous VUSMYL3<sub>(170C>A)</sub> carrier. (A)** Bright field image of cultured iPSC colonies. Scale bar: 100  $\mu$ m. **(B)** Pluripotency related gene expression in the heterozygous VUSMYL3<sub>(170C>A)</sub> iPSCs relative to human ESC line H7. **(C)** Immunostaining of the heterozygous VUSMYL3<sub>(170C>A)</sub> iPSCs using anti-OCT4 (green) and anti-SSEA4 antibody (red). Scale bar: 200  $\mu$ m. **(D)** FACS analysis of OCT4 and SSEA4 expression in the heterozygous VUSMYL3<sub>(170C>A)</sub> iPSCs. Blue, isotype control; Red, antigen staining for SSEA4 (left panel) or OCT4 (right panel). **(E)** Gene expression analysis of pluripotency related genes and differentiation related genes after embryoid body formation. **(F)** Normal karyotype of the heterozygous VUSMYL3<sub>(170C>A)</sub> iPSCs. Error bar: three replicates, mean  $\pm$  SD.

**Supplemental Figure S3. Identification of iPSC-CMs derived from the two healthy control**

**lines, isogenic corrected line and heterozygous *VUSMYL3*<sub>(170C>A)</sub> line. (A)** Sanger sequencing confirmation of the isogenic corrected iPSC clone 2 and clone 3. **(B)** Bright field morphology of iPSC-CMs from the two healthy control lines, three isogenic corrected clones, and heterozygous *VUSMYL3*<sub>(170C>A)</sub> line. Scale bars, 50  $\mu$ m. **(C)** Flow cytometry analyses of specific iPSC-CMs markers (TNNT and sarcomeric- $\alpha$ -actinin). Blue, isotype control; Red, antigen staining for TNNT (upper panel) or  $\alpha$ -Actinin (lower panel). **(D)** Immunostaining analysis of specific iPSC-CMs markers TNNT (green) and sarcomeric- $\alpha$ -actinin (red) of the isogenic corrected iPSC clone 2 and clone 3 derived CMs. **(E)** Cell size measurement of three isogenic corrected iPSC clones-derived CMs. Data from  $\geq 200$  cells (acquired from three differentiations performed at three separate occasions) of each clone, mean  $\pm$  SD. ns: non-significant, compared with isogenic corrected clone 1.

**Supplemental Figure S4. Gene expression analysis of three isogenic corrected iPSC clones-derived CMs.**

Gene expression profile (*NPPA*, *MYH6*, *TNNT2*, *MYH7*, *MYL2*, *MYL3*, *MYL4*, *MYL6*, *MYL7* and *MYL9*) of three isogenic corrected iPSC clones-derived CMs. Data from three replicates (acquired from three differentiations performed on three separate occasions), mean  $\pm$  SD.

ns: non-significant, compared with isogenic corrected clone 1.

**Supplemental Figure S5. Functional analysis of the isogenic corrected iPSC clones-derived CMs and heterozygous *VUSMYL3*<sub>(170C>A)</sub> iPSC-CMs. (A)** Beating rate (left panel), contraction velocity (middle panel), and relaxation velocity (right panel) analysis of three isogenic corrected iPSC clones-derived CMs. Data from three replicates, mean  $\pm$  SD. ns: non-significant, compared

with isogenic corrected clone1. **(B)** Contraction distance, relaxation distance, contraction duration, and relaxation duration analysis of iPSC-CMs from the two healthy control lines, isogenic corrected clone 1, and heterozygous *VUSMYL3*<sub>(170C>A)</sub> line. Data from three replicates, mean ± SD. ns: non-significant, compared with two healthy control lines, and the isogenic corrected clone 1. **(C)** Number of iPSC-CMs showing proarrhythmic activity in isogenic corrected clone 2 and clone 3-derived CMs lines. **(D)** Number of iPSC-CMs showing calcium transients with a proarrhythmic phenotype in isogenic corrected clone 2 and clone 3-derived CMs lines. Three replicates means three differentiations performed on three separate occasions.

**Supplemental Figure S6. Sequence validation of homozygous *VUSMYL3*<sub>(170C>A)</sub> and frameshift mutation *MYL3*<sup>(170C>A/fs)</sup> iPSC clones.** **(A)** Sequence of gRNA and ssODN used for generating the homozygous *VUSMYL3*<sub>(170C>A)</sub> iPSC line. **(B)** Sanger sequencing results of homozygous *VUSMYL3*<sub>(170C>A)</sub> iPSC clone 2 and clone 3. **(C)** Sanger sequencing results of genomic DNA isolated from frameshift mutation *MYL3*<sup>(170C>A/fs)</sup> clone 2 and clone 3 showing 1bp insertion in the genome of frameshift mutation *MYL3*<sup>(170C>A/fs)</sup> clone2 (upper panel) and 13bp deletion in the genome of frameshift mutation *MYL3*<sup>(170C>A/fs)</sup> clone3 (lower panel). Red lower-case letters (tga): premature stop codon, Red capitalized letter ‘A’: *VUSMYL3*<sub>(170C>A)</sub>. **(D)** Sanger sequencing results of cDNA from frameshift mutation *MYL3*<sup>(170C>A/fs)</sup> clone1 (top panel), clone2 (middle panel) and clone3 (bottom panel). Nucleotides positions of the *VUSMYL3*<sub>(170C>A)</sub> are depicted by a framing square.

**Supplemental Figure S7. Characterization of homozygous *VUSMYL3*<sub>(170C>A)</sub> and frameshift mutation *MYL3*<sup>(170C>A/fs)</sup> clones-derived CMs.** **(A)** Gene expression profile of three



homozygous *VUSMYL3*<sub>(170C>A)</sub> (left panel) and three frameshift mutation *MYL3*<sup>(170C>A/fs)</sup> clones-derived CMs (right panel). **(B)** Cell size measurement of homozygous *VUSMYL3*<sub>(170C>A)</sub> (left panel) and frameshift mutation *MYL3*<sup>(170C>A/fs)</sup> (right panel) clones-derived CMs. Data from  $\geq 200$  cells, mean  $\pm$  SD. **(C)** Immunostaining analysis.. Scale bars: 10  $\mu$ m. **(D-F)** Beating rate, contraction velocity, and relaxation velocity analysis, respectively. **(G)** Number of homozygous *VUSMYL3*<sub>(170C>A)</sub> clone 2- and clone 3- (left panel) and frameshift mutation *MYL3*<sup>(170C>A/fs)</sup> clone 2- and clone 3- (right panel) derived CMs showing normal and proarrhythmic activity. **(H)** Number of homozygous *VUSMYL3*<sub>(170C>A)</sub> clone 2- and clone 3- (left panel) and frameshift mutation *MYL3*<sup>(170C>A/fs)</sup> clone 2- and 3- (right panel) -derived CMs showing calcium transients with a proarrhythmic phenotype. Measurements were conducted in three replicates (three differentiations performed at three separate occasions). ns: non-significant, compared with either homozygous *VUSMYL3*<sub>(170C>A)</sub> clone 1 or frameshift mutation *MYL3*<sup>(170C>A/fs)</sup> clone 1. Data presented as mean  $\pm$  SD.

**Supplemental Figure S8. Characterization of *MYL3*<sub>(170C>G)</sub> and *MYBPC3*<sub>(961G>A)</sub> iPSC-CMs.**

**(A)** Sequence of gRNA and ssODN used for generating the isogenic *MYL3*<sub>(170C>G)</sub> iPSC line. **(B)** Sanger sequencing results of *MYL3*<sub>(170C>G)</sub> iPSC clone 2 and clone 3. **(C)** Cell size measurement of three *MYL3*<sub>(170C>G)</sub> clones-derived CMs. Data from  $\geq 200$  cells, **(D)** Immunostaining analysis of three *MYL3*<sub>(170C>G)</sub> clones-derived CMs and *MYBPC3*<sub>(961G>A)</sub> iPSC-CMs. Scale bars: 10  $\mu$ m. **(E)** HCM-related gene expression analysis of the three *MYL3*<sub>(170C>G)</sub> clones-derived CMs. **(F)** Beating rate (top panel), contraction velocity (middle panel), and relaxation velocity (bottom panel) analysis of three *MYL3*<sub>(170C>G)</sub> clones-derived CMs. **(G)** Number of *MYL3*<sub>(170C>G)</sub> clone 2- and clone 3-derived CMs showing proarrhythmic activity. **(H)** Number of *MYL3*<sub>(170C>G)</sub> clone 2- and clone 3-derived CMs showing calcium transients with a proarrhythmic phenotype. **(I)**

Diastolic calcium of the isogenic corrected, heterozygous *VUSMYL3*<sub>(170C>A)</sub>, homozygous *VUSMYL3*<sub>(170C>A)</sub>, frameshift *MYL3*<sup>(170C>A/fs)</sup>, *MYL3*<sub>(170C>G)</sub> and *MYBPC3*<sub>(961G>A)</sub> iPSC-CMs. ns: non-significant, \* p<0.05, compared with the isogenic corrected line.

Measurements in all panels were conducted in three replicates (three differentiations performed at three separate occasions). In panels C, E, F, ns: non-significant, compared with *MYL3*<sub>(170C>G)</sub> clone1. Data presented as mean ± SD.

**Supplemental Table S1. 17 “likely pathogenic” variants detected in healthy individuals**

| Locus           | gene          | location       | function | protein      | coding     | Polyphen-2 | Associated disease |
|-----------------|---------------|----------------|----------|--------------|------------|------------|--------------------|
| chr1:116275561  | <i>CASQ2</i>  | NM_001232.3    | missense | p.Phe189Leu  | c.567C>G   | 1          | CPVT               |
| chr2:220284876  | <i>DES</i>    | NM_001927.3    | missense | p.Ala213Val  | c.638C>T   | 0.896      | ARVC/DCM           |
| chr3:38645238   | <i>SCN5A</i>  | NM001160161.1  | missense | p.Leu619Phe  | c.1855C>T  | 0.975      | LQT                |
| chr3:46902303   | <i>MYL3</i>   | NM_000258.2    | missense | p.Ala57Asp   | c.170C>A   | 1          | HCM                |
| chr4:114288907  | <i>ANK2</i>   | NM_001148.4    | missense | p.Leu3740Ile | c.11218C>A | 0.905      | VT /VF             |
| chr4:114288920  | <i>ANK2</i>   | NM_001148.4    | missense | p.Thr3744Asn | c.11231C>A | 0.951      | VT /VF             |
| chr8:11614575   | <i>GATA4</i>  | NM_002052.4    | missense | p.Ser377Gly  | c.1129A>G  | 0.54       | DCM                |
| chr10:69881254  | <i>MYPN</i>   | NM_001256267.1 | missense | p.Tyr20Cys   | c.59A>G    | 1          | HCM/DCM            |
| chr11:123513271 | <i>SCN3B</i>  | NM_018400.3    | missense | p.Val110Ile  | c.328G>A   | 0.999      | LQT                |
| chr11:47359047  | <i>MYBPC3</i> | NM_000256.3    | missense | p.Ala833Thr  | c.2497G>A  | 0.999      | HCM                |
| chr12:121175678 | <i>ACADS</i>  | NM_000017.3    | missense | p.Arg171Trp  | c.511C>T   | 0.994      | SCAD               |
| chr12:121176083 | <i>ACADS</i>  | NM_000017.3    | missense | p.Gly209Ser  | c.625G>A   | 0.664      | SCAD               |
| chr14:23892910  | <i>MYH7</i>   | NM_000257.3    | missense | p.Met982Thr  | c.2945T>C  | 0.985      | HCM                |
| chr19:49686146  | <i>TRPM4</i>  | NM_017636.3    | missense | p.Trp525Ter  | c.1575G>A  | -          | Brugada            |
| chrX:31496398   | <i>DMD</i>    | NM_004006.2    | missense | p.His2921Arg | c.8762A>G  | 0.83       | DMD                |
| chrX:31496426   | <i>DMD</i>    | NM_004006.2    | missense | p.Asn2912Asp | c.8734A>G  | 0.08       | DMD                |
| chrX:31496431   | <i>DMD</i>    | NM_004006.2    | missense | p.Glu2910Val | c.8729A>T  | 0.21       | DMD                |

Catecholaminergic polymorphic ventricular tachycardia (CPVT); arrhythmogenic right ventricular cardiomyopathy (ARVC); hypertrophic cardiomyopathy (HCM); long QT (LQT); ventricular tachycardia/ventricular fibrillation (VT/VF); dilated cardiomyopathy (DCM); spontaneous coronary artery dissection (SCAD); duchenne muscular dystrophy (DMD).

**Supplemental Table S2. Frequencies of the VUSMYL3<sub>(170C>A)</sub> in different populations**

| Population             | Allele Count | Allele Number | Homozygous Number | Allele Frequency |
|------------------------|--------------|---------------|-------------------|------------------|
| European (Non-Finnish) | 5            | 66684         | 0                 | 7.498e-05        |
| South Asian            | 5            | 16512         | 0                 | 0.0003028        |
| East Asian             | 3            | 8646          | 0                 | 0.000347         |
| Latino                 | 1            | 11574         | 0                 | 8.64e-05         |
| Other                  | 0            | 906           | 0                 | 0                |
| African                | 0            | 10402         | 0                 | 0                |
| Finnish                | 0            | 6614          | 0                 | 0                |
| Total                  | 14           | 121338        | 0                 | 0.0001154        |

**Supplemental Table S3. No indels were found at the potential off-target loci of the gRNA for generating three independent isogenic corrected clones (C1, C2 and C3).**

| Sequence                | Mismatches      | Locus            | Indels |    |    |
|-------------------------|-----------------|------------------|--------|----|----|
|                         |                 |                  | C1     | C2 | C3 |
| GGTCTTCCTTGCACTCTGCCGAG | 2MMs [1:12]     | chr14:-105241012 | N      | N  | N  |
| AGTTTTTATTGAACTCTGCCCAG | 3MMs [4:7:8]    | chr12:-45858141  | N      | N  | N  |
| ACTCTTCCAGGAACTCTGCCAAG | 3MMs [2:9:10]   | chr8:+139651269  | N      | N  | N  |
| AGGGCTCATTGAACTCTGCCAAG | 4MMs [3:4:5:8]  | chr2:-60510140   | N      | N  | N  |
| CTTCTTCATAGAACTCTGCCAAG | 4MMs [1:2:8:10] | chr11:-77389083  | N      | N  | N  |
| TTTCTTCATAGAACTCTGCCTGG | 4MMs [1:2:8:10] | chr14:-99019889  | N      | N  | N  |
| TGCTGTCCTTGAACTCTGCCGGG | 4MMs [1:3:4:5]  | chr20:+39783116  | N      | N  | N  |
| AGTGGTTGTTGAACTCTGCCTGG | 4MMs [4:5:7:8]  | chr18:+48814709  | N      | N  | N  |
| TTTCTCCTTTGAACTCTGCCCAG | 4MMs [1:2:6:8]  | chr9:+2359678    | N      | N  | N  |
| ACCCTTCTCTGAACTCTGCCCAG | 4MMs [2:3:8:9]  | chr13:-95203119  | N      | N  | N  |

**Supplemental Table S4. No indels were found at the potential off-target loci of the gRNA for generating three independent homozygous *VUSMYL3*<sub>(170C>A)</sub> clones (C1, C2 and C3).**

| Sequence                | Mismatches       | Locus            | Indels |    |    |
|-------------------------|------------------|------------------|--------|----|----|
|                         |                  |                  | C1     | C2 | C3 |
| AGTGAGGTTGAACAGCATGAGAG | 3MMs [1:5:9]     | chr12:-107792399 | N      | N  | N  |
| TGGGCAGTCAAACAGCATGAGAG | 3MMs [3:6:10]    | chr18:+52953785  | N      | N  | N  |
| TGTGCTTTCCAACAGCATGAGAG | 3MMs [6:7:10]    | chr10:+4729601   | N      | N  | N  |
| TGTCCTCTCCAACAGCATGACAG | 4MMs [4:6:7:10]  | chr1:+40222149   | N      | N  | N  |
| GATGCGATCGAACAGCATGTGAG | 4MMs [1:2:7:20]  | chr6:+41250150   | N      | N  | N  |
| TCTGTGGTAGCACAGCATGAGAG | 4MMs [2:5:9:11]  | chr5:-132089491  | N      | N  | N  |
| AGTGGGGTTGAAGAGCATGAGGG | 4MMs [1:5:9:13]  | chr11:+127348738 | N      | N  | N  |
| TGTGGGTTCAAAAGCATGAAGG  | 4MMs [5:7:10:13] | chr5:-54405129   | N      | N  | N  |
| TGTCCAGTCCAACAGCTTGAGGG | 4MMs [4:6:10:17] | chr3:+129239902  | N      | N  | N  |
| AGTGGGGTCGTACAGCATCAGAG | 4MMs [1:5:11:19] | chr1:+156884123  | N      | N  | N  |

**Supplemental Table S5. No indels were found at the potential off-target loci of the gRNA for generating three independent *MYL3*<sub>(170C>G)</sub> clones (C1, C2 and C3).**

| Sequence                 | Mismatches      | Locus            | Indels |    |    |
|--------------------------|-----------------|------------------|--------|----|----|
|                          |                 |                  | C1     | C2 | C3 |
| GGTCTTCCTTGCACTCTGCCGAG  | 2MMs [1:12]     | chr14:-105241012 | N      | N  | N  |
| AGTTTTTATTGAACTCTGCCCAG  | 3MMs [4:7:8]    | chr12:-45858141  | N      | N  | N  |
| ACTCTTCCAGGAACTCTGCCAAG  | 3MMs [2:9:10]   | chr8:+139651269  | N      | N  | N  |
| AGGGCTCATTGAACTCTGCCAAG  | 4MMs [3:4:5:8]  | chr2:-60510140   | N      | N  | N  |
| CTTCTTCATAGAACTCTGCCAAG  | 4MMs [1:2:8:10] | chr11:-77389083  | N      | N  | N  |
| TTTCTTCATAGAACTCTGCCTGG  | 4MMs [1:2:8:10] | chr14:-99019889  | N      | N  | N  |
| TGCTGTCCTTGA ACTCTGCCGGG | 4MMs [1:3:4:5]  | chr20:+39783116  | N      | N  | N  |
| AGTGGTTGTTGAACTCTGCCTGG  | 4MMs [4:5:7:8]  | chr18:+48814709  | N      | N  | N  |
| TTTCTCCTTTGAACTCTGCCCAG  | 4MMs [1:2:6:8]  | chr9:+2359678    | N      | N  | N  |
| ACCCTTCTCTGAACTCTGCCCAG  | 4MMs [2:3:8:9]  | chr13:-95203119  | N      | N  | N  |

**Reference:**

1. Burridge PW, Li YF, Matsa E, Wu H, Ong SG, Sharma A, Holmstrom A, Chang AC, Coronado MJ, Ebert AD, Knowles JW, Telli ML, Witteles RM, Blau HM, Bernstein D, Altman RB and Wu JC. Human induced pluripotent stem cell-derived cardiomyocytes recapitulate the predilection of breast cancer patients to doxorubicin-induced cardiotoxicity. *Nat Med.* 2016;22:547-556.



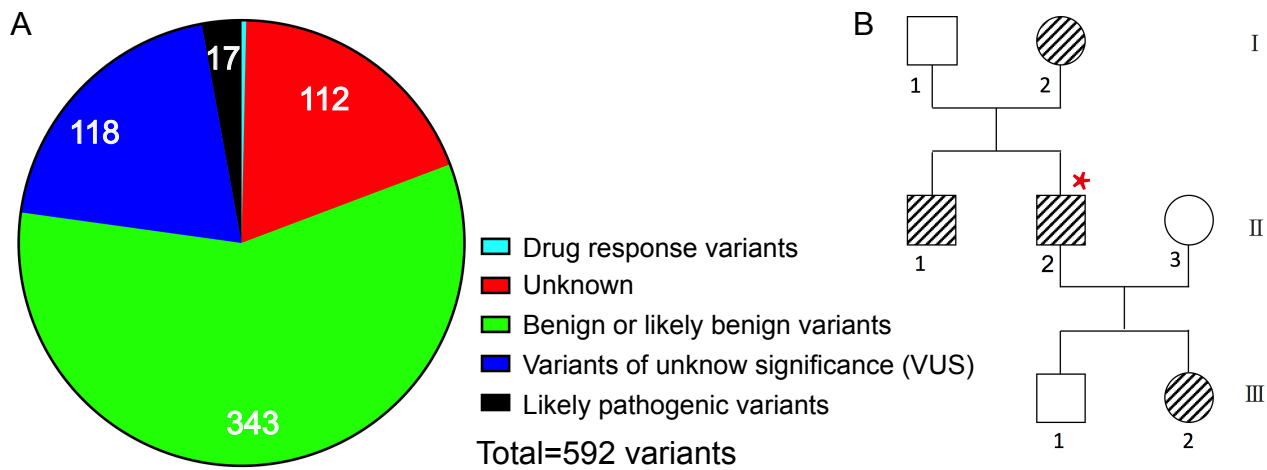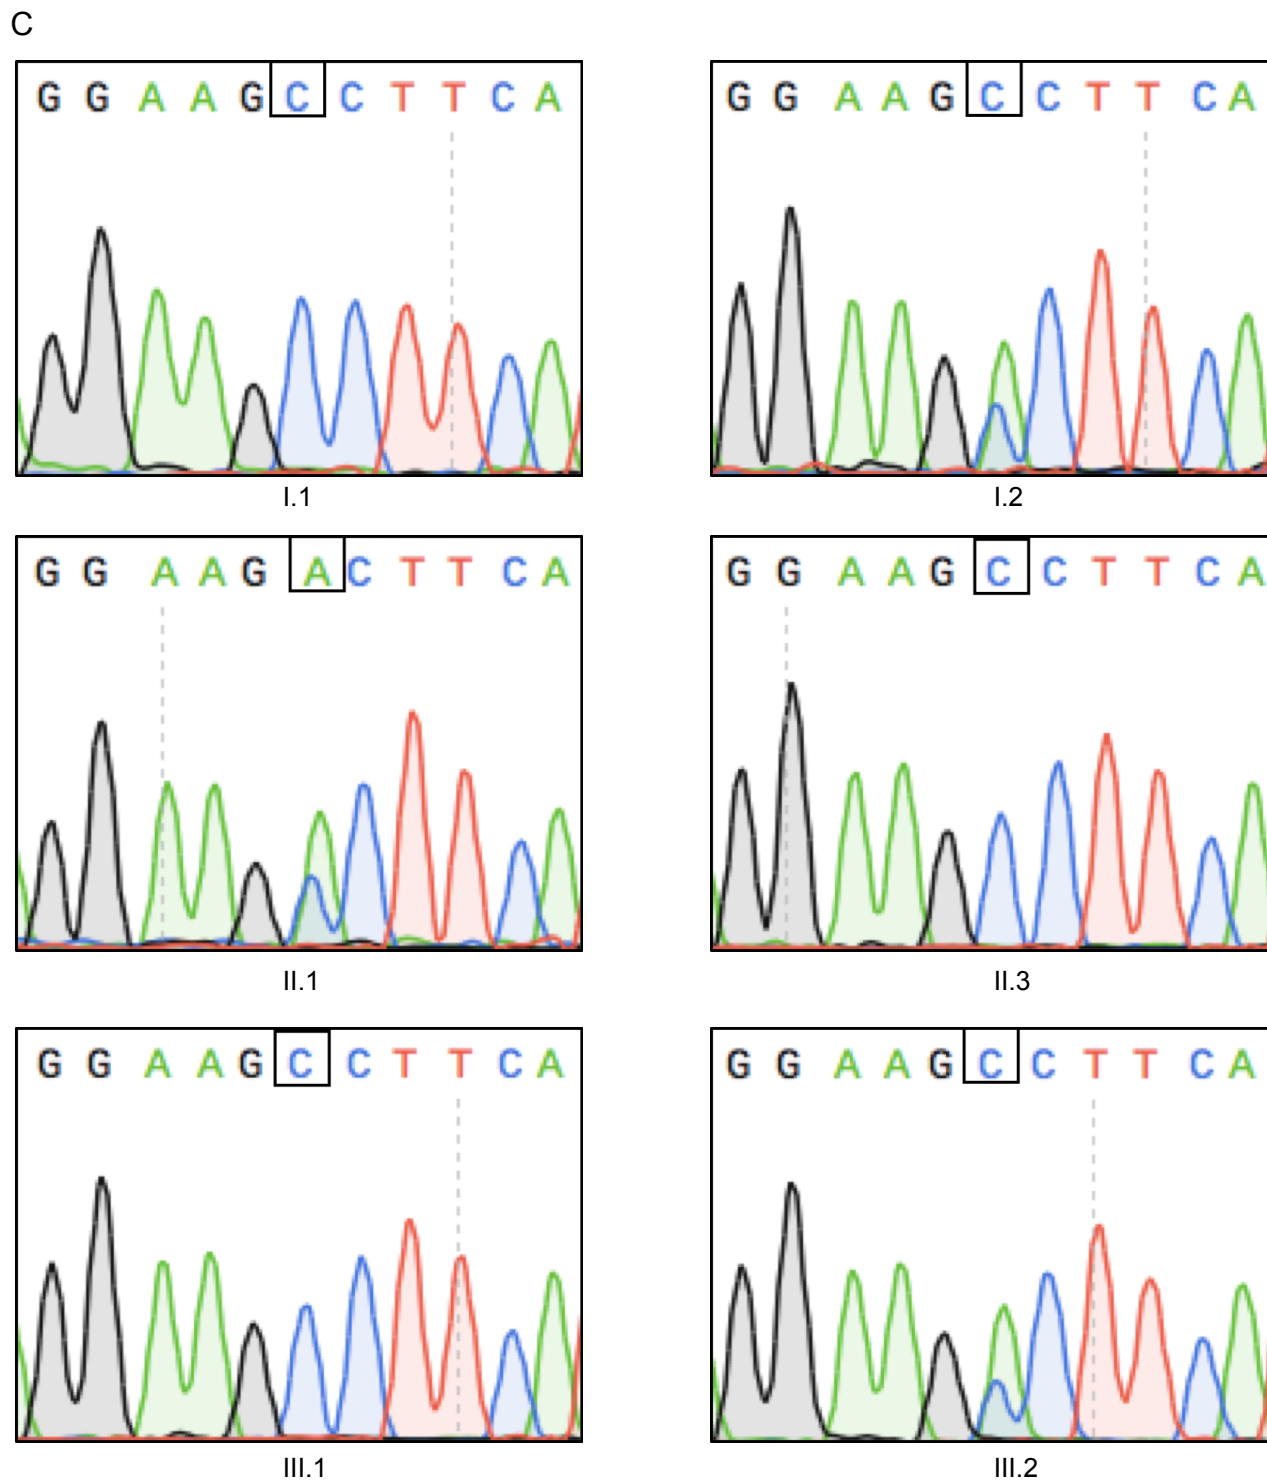

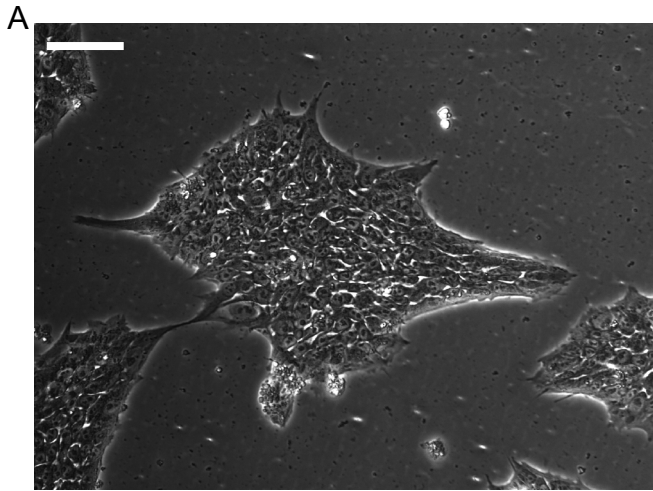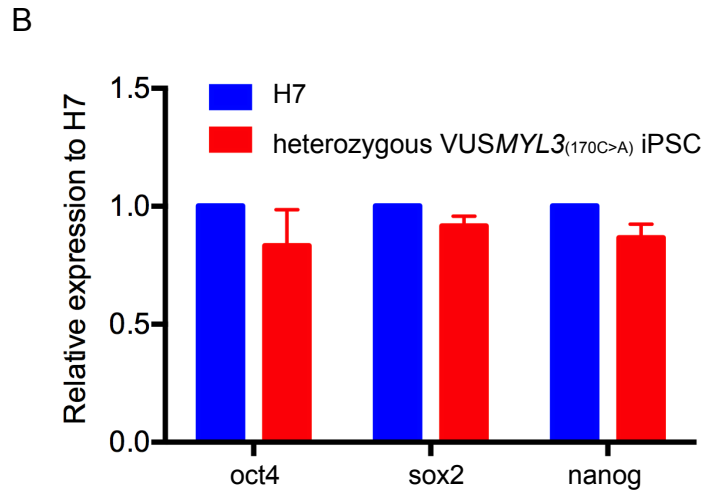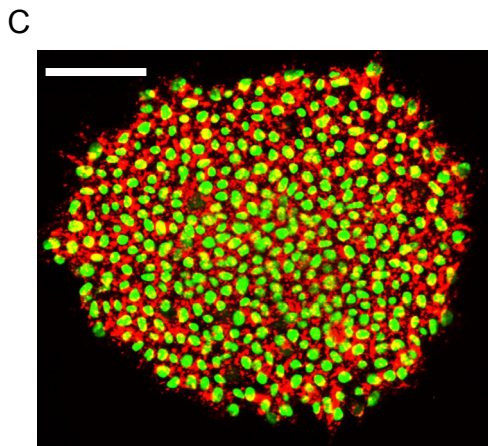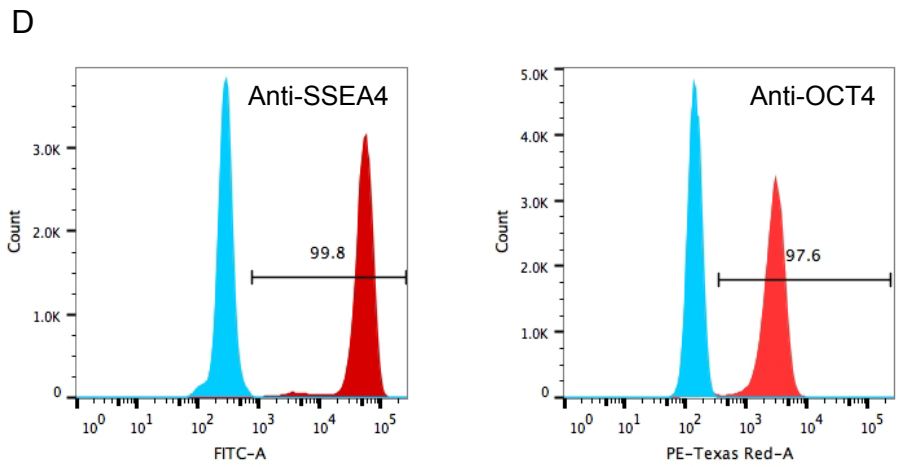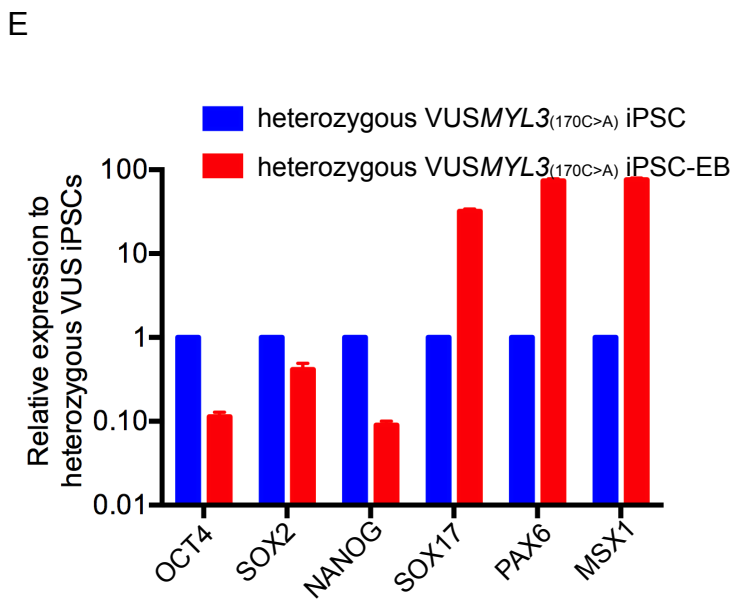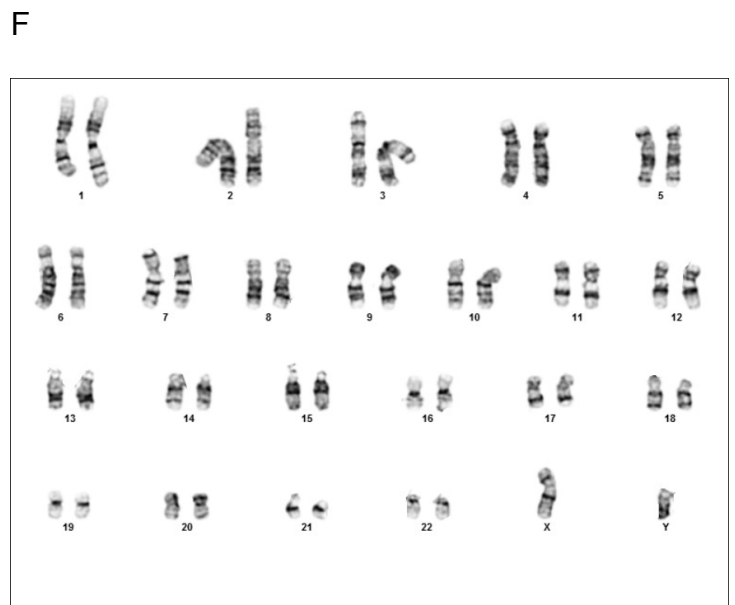

A

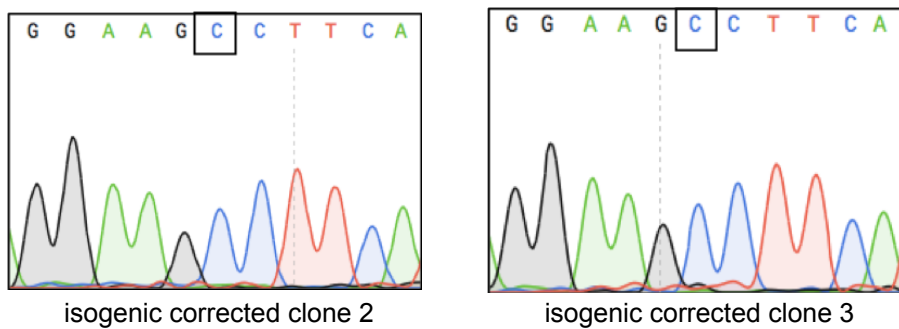

D

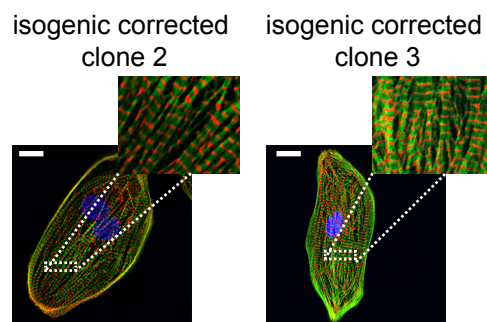

B

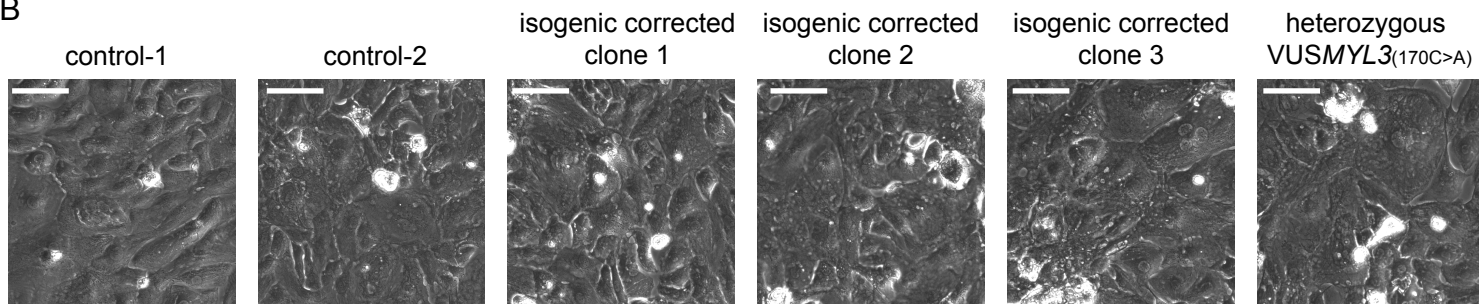

C

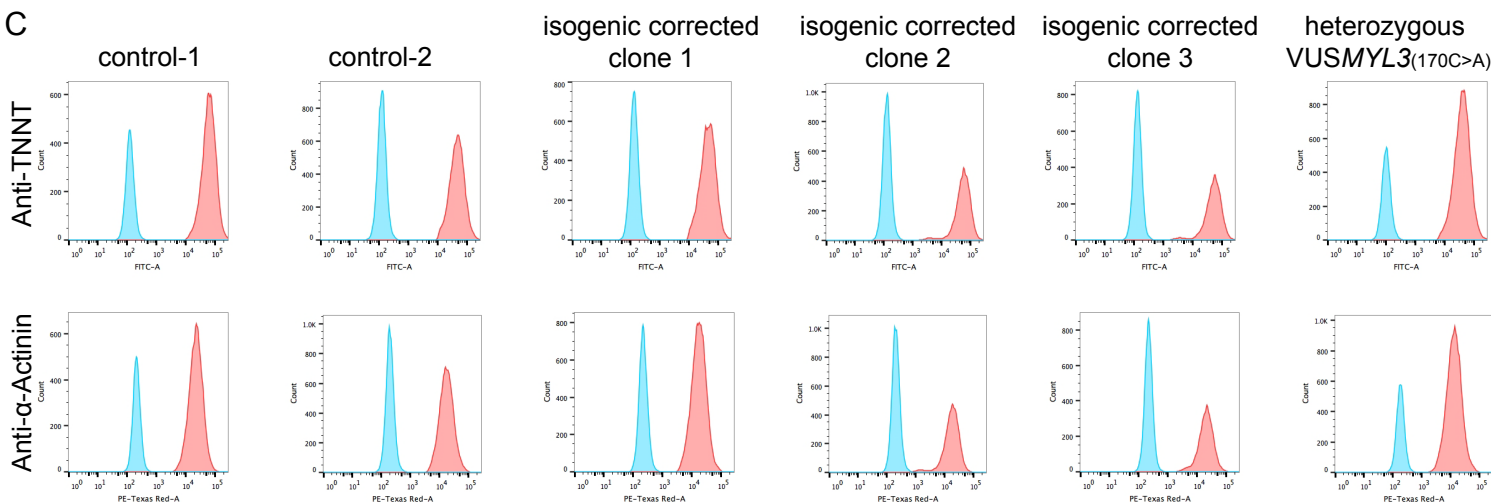

E

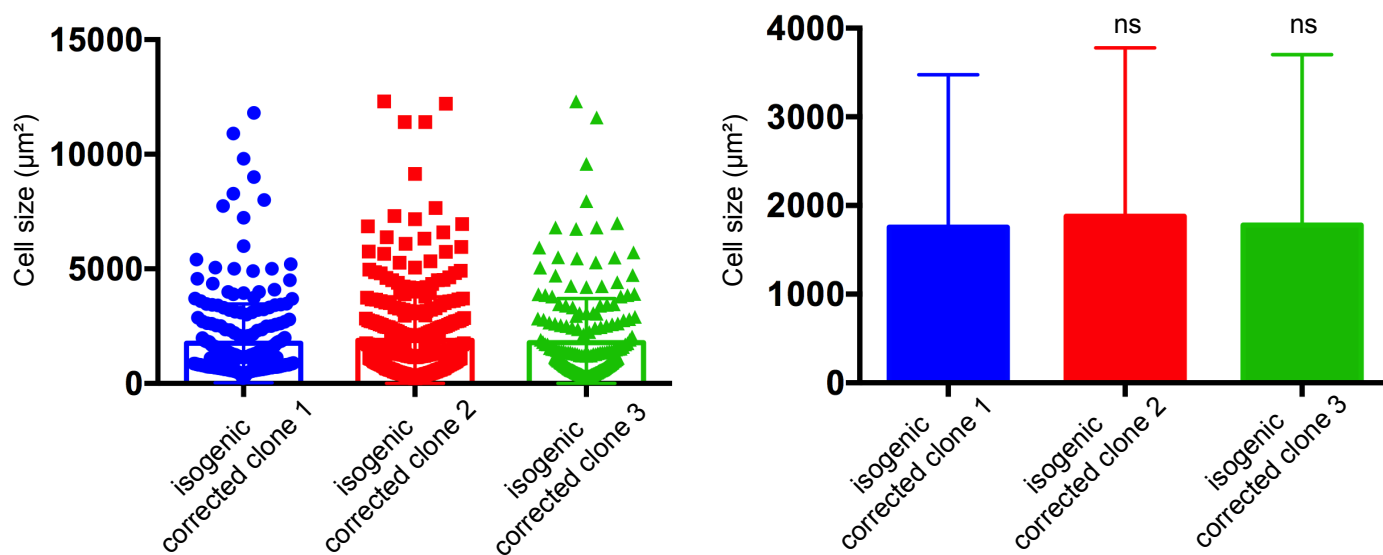



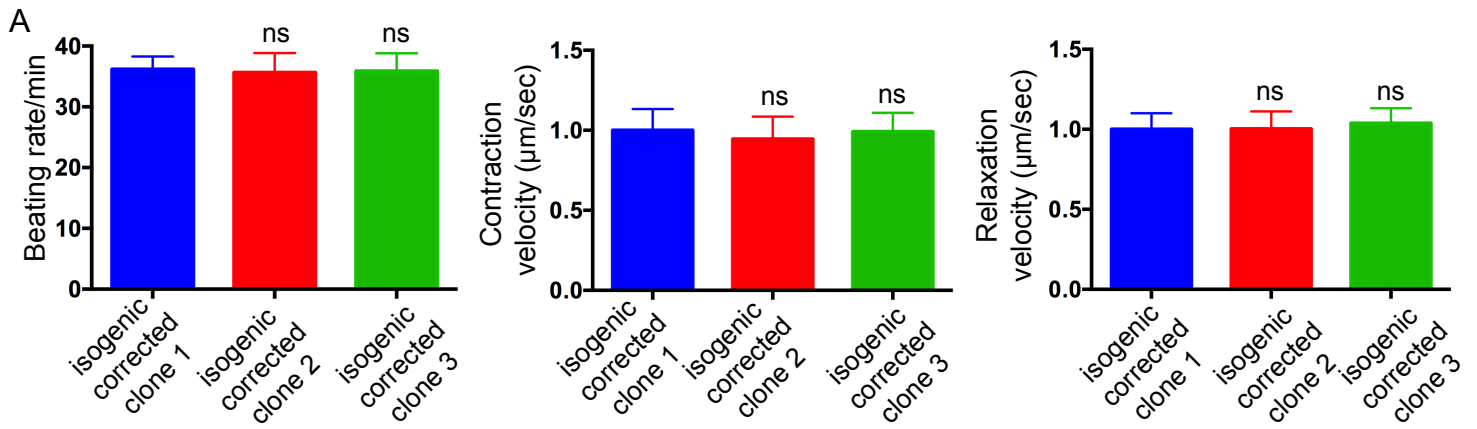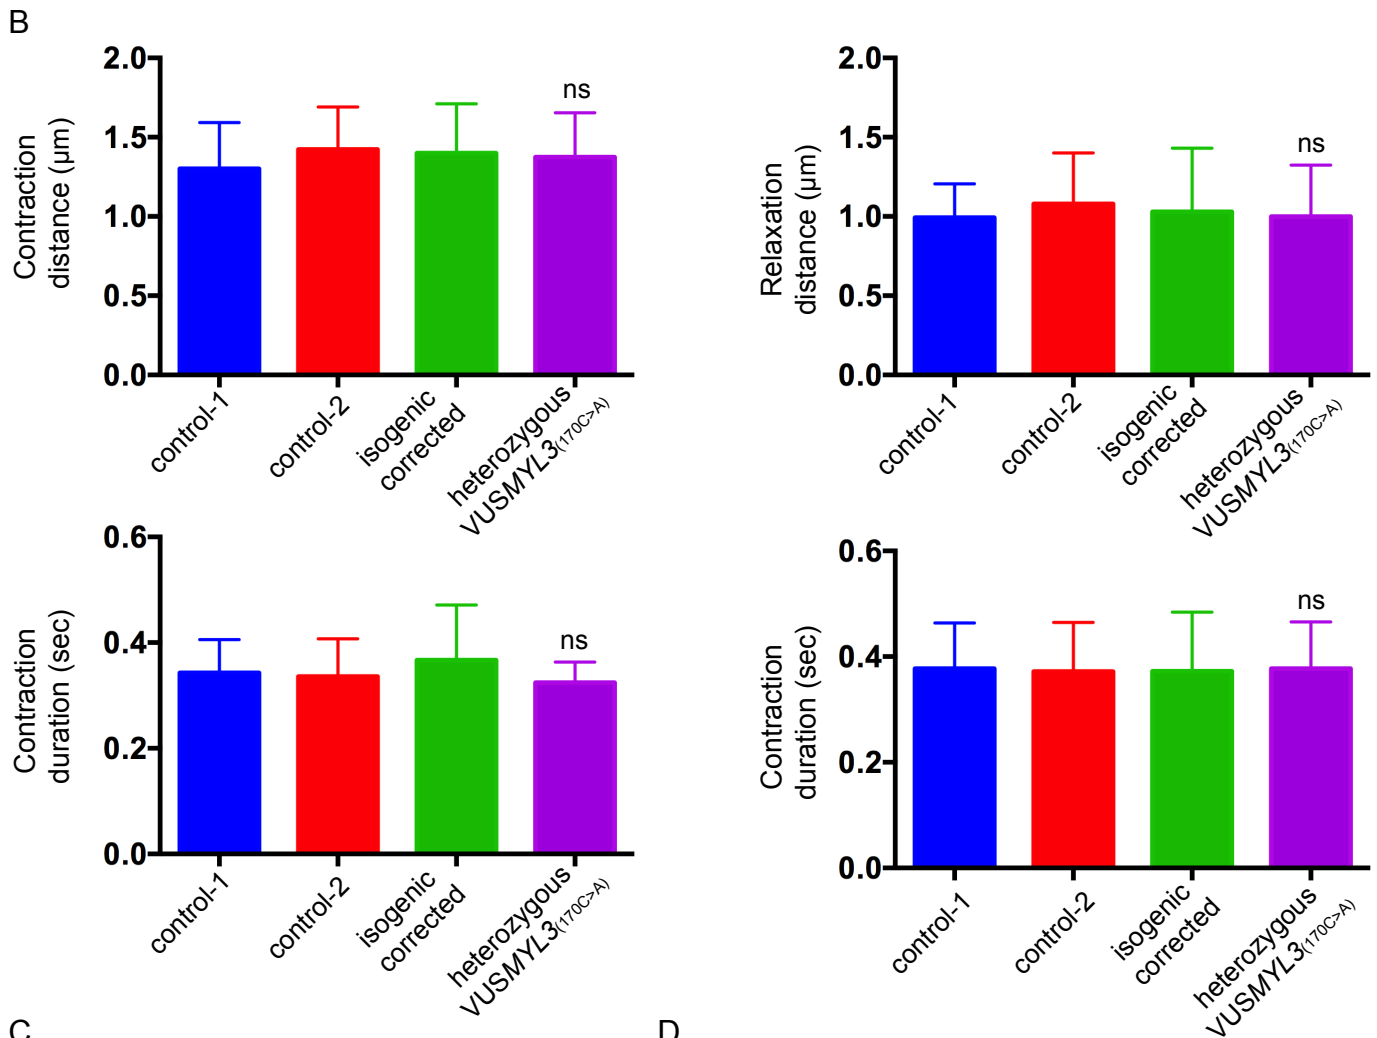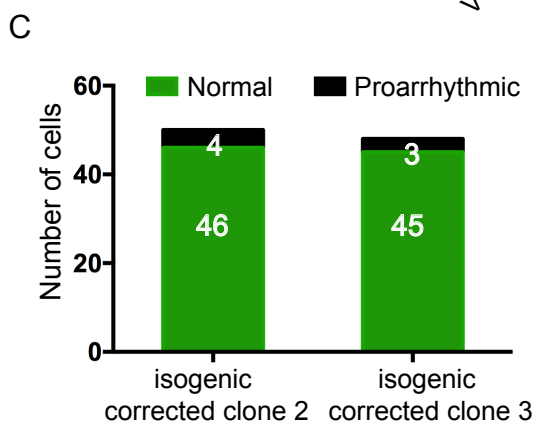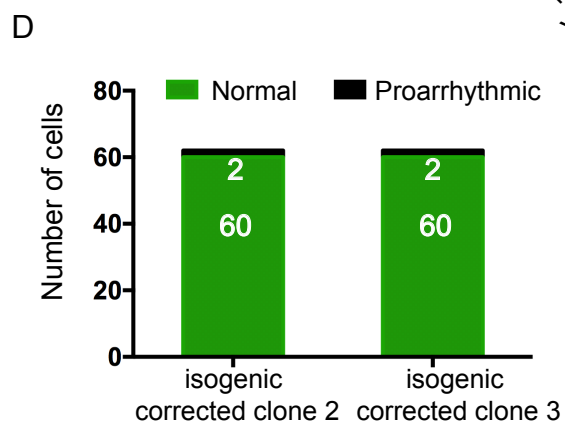

A

5'-ggaagccttcatgctgttcgaccgcacacccaagt-3' myl3  
 3'-cccttcggaagtacgacaagctggcgtgtgggttca-5' wild type allele  
 ggaagtacgacaagctggcgtgt-5' homozygous-VUSmyl3(C>A) gRNA  
 ggggtccctggctgagggtcctgccaggggtgtgggagtgggtaggctgaccctgggagtgctgtggctcact  
 gcctctcctggcagagtcaaggaagActtcatgtgttcgaccgcac -3' homozygous-VUS ssODN

B homozygous clone 2

homozygous clone 3

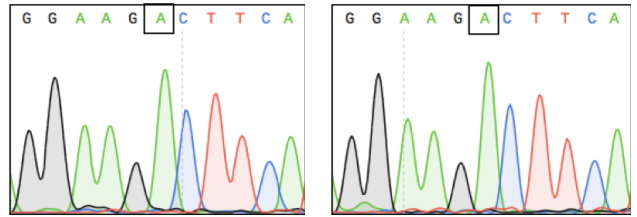

C

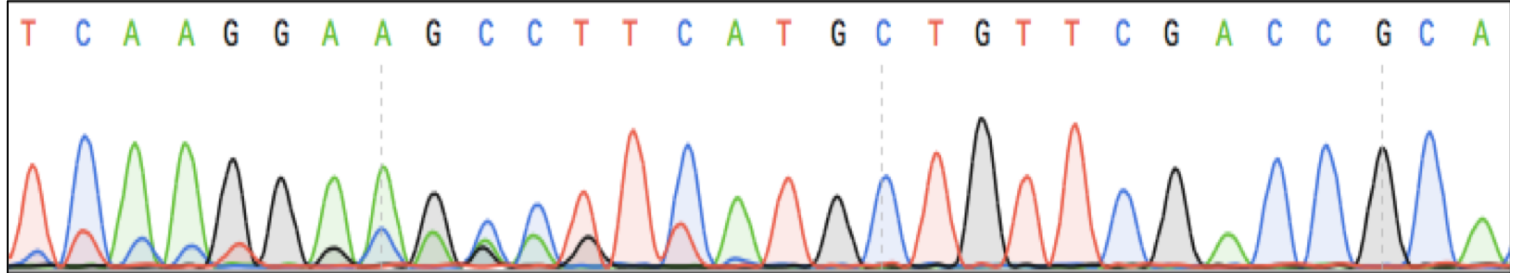

VUSMYL3(170C>A) allele Ag ttc aag gaa gAc ttc atg ctg ttc gac cgc aca ccc aag tgt gag atg aag atc acc t  
 frameshift mutation Ag ttc aag gaa gCc ttc att gct gtt cga ccg cac acc caa gtg tga gat gaa gat cac c  
 allele

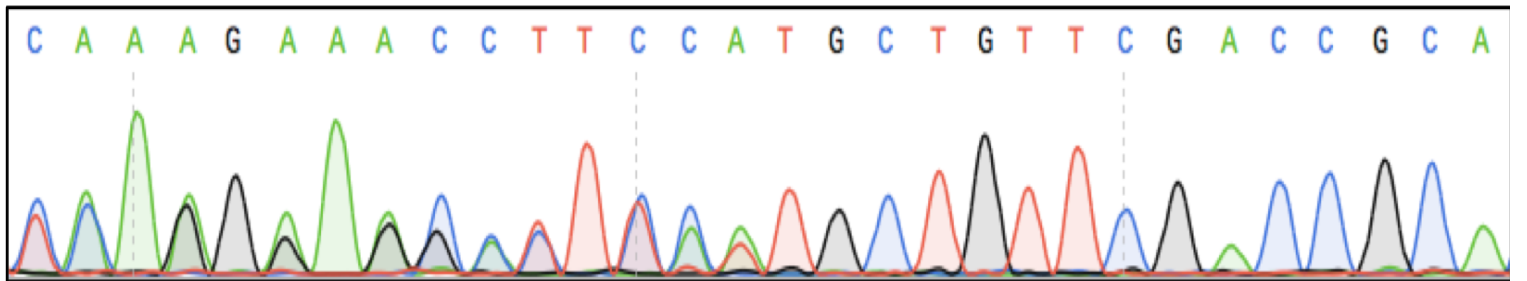

VUSMYL3(170C>A) allele Ag ttc aag gaa gAc ttc atg ctg ttc gac cgc aca ccc aag tgt gag atg aag atc acc t  
 frameshift mutation Ag tt- --- --- --- ---a tgc tgt tcg acc gca cac cca agt gtg aga tga aga tca cct  
 allele

D

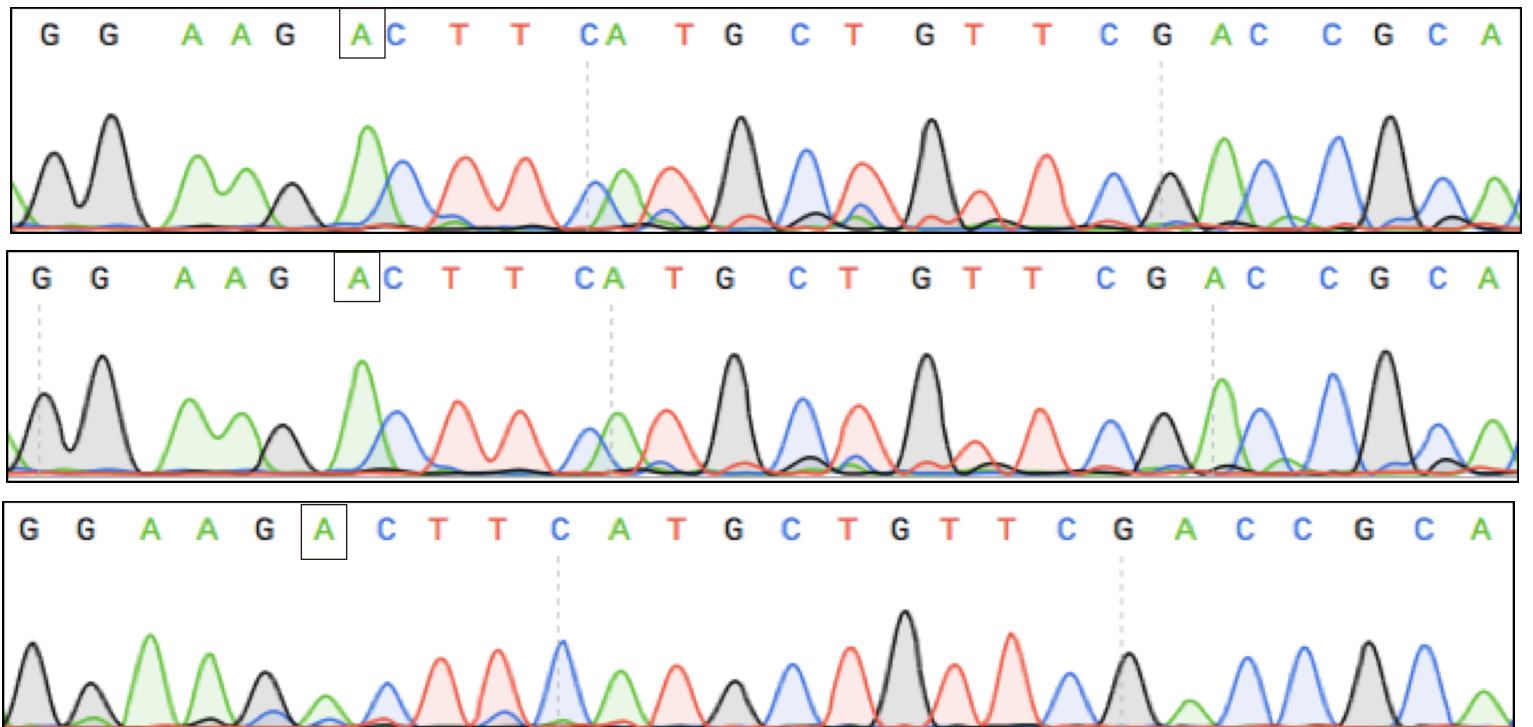

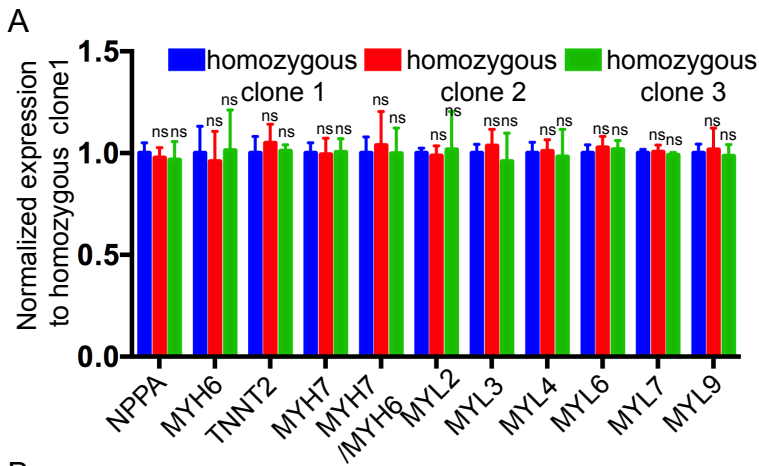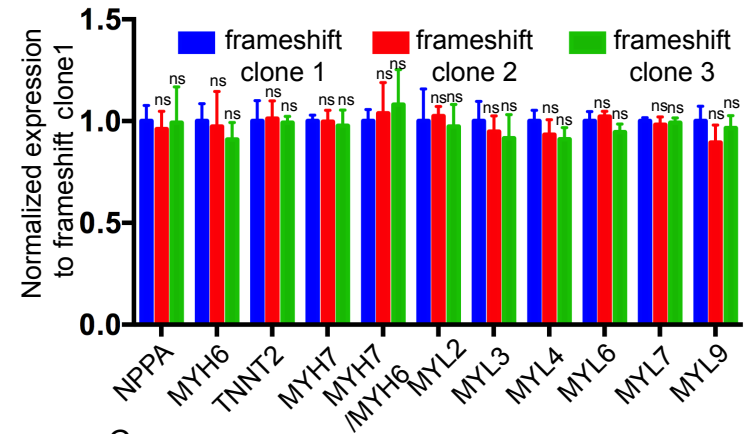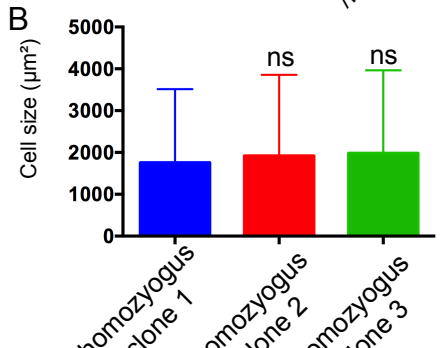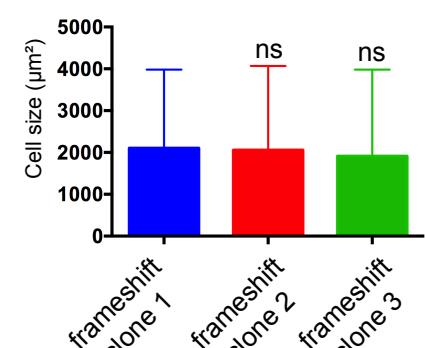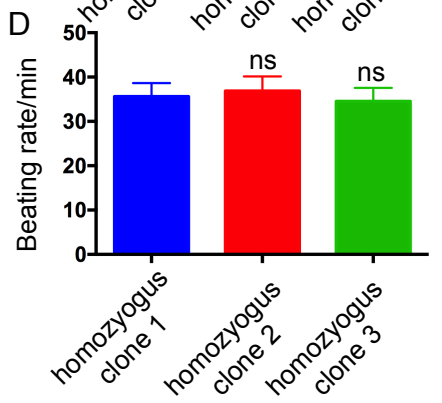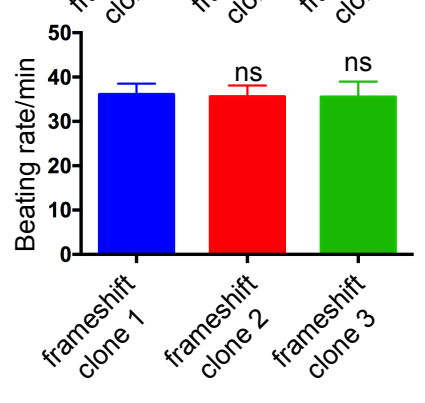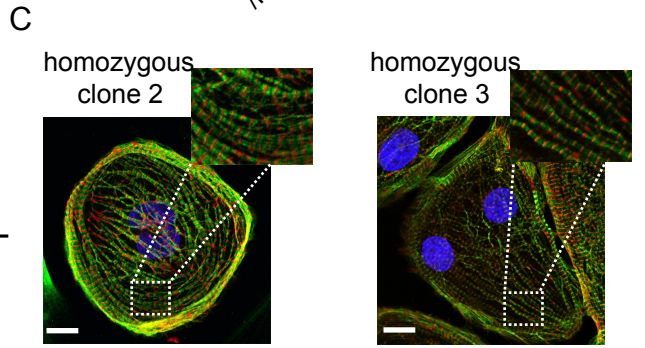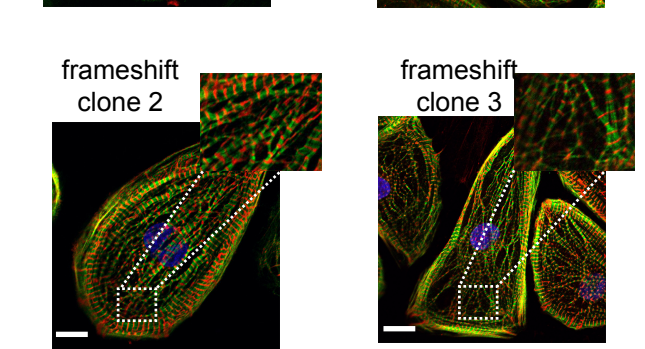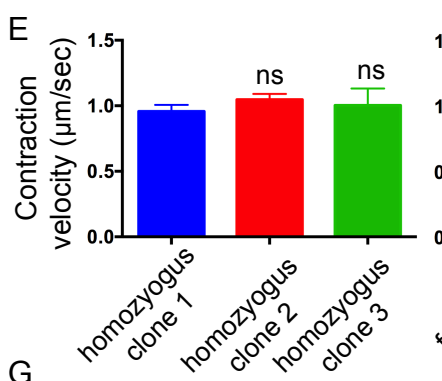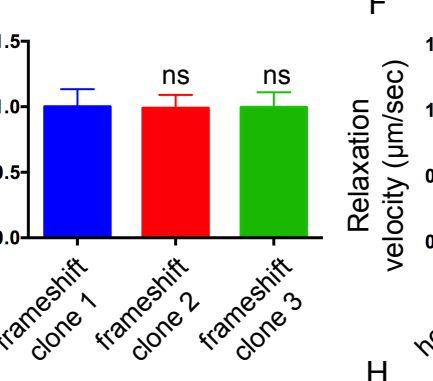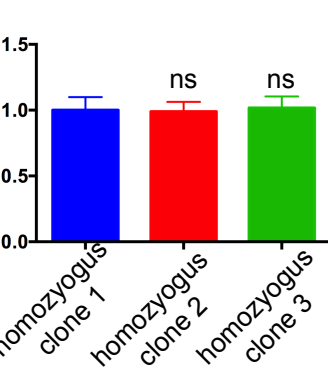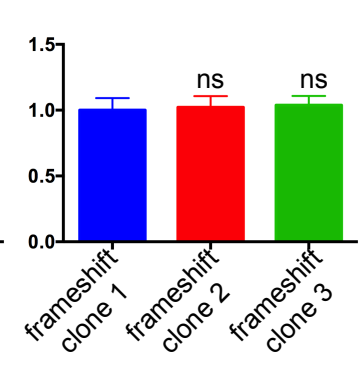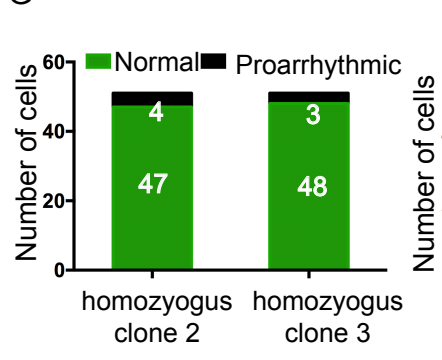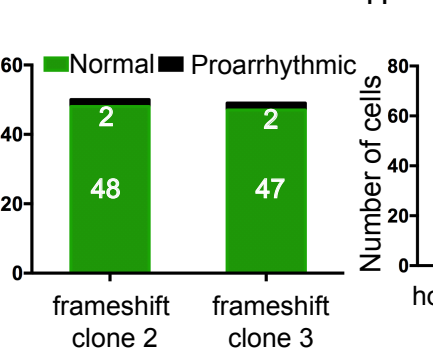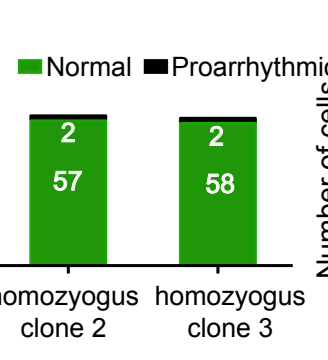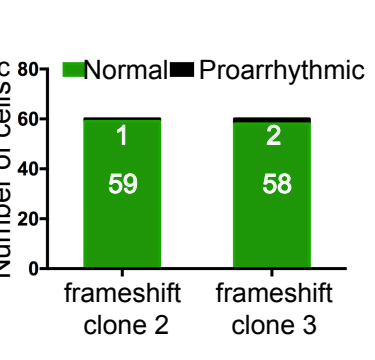

Supplement: NIHMS965967-supplement-Supplemental_data.pdf [file NIHMS965967-supplement-Supplemental_data.pdf]
